# Supplementary material for: Epigenetic Mechanisms Are Involved in Sex-Specific Trans-Generational Immune Priming in the Lepidopteran Model Host Manduca sexta
Source: Front Physiol. 2019 Mar 4;10:137. doi: 10.3389/fphys.2019.00137 (PMC6410660; doi:10.3389/fphys.2019.00137)
Supplement: Supplementary file 6 [file Table_8.xlsx]

## Sheet: Table 8A
Biological sample	Sample	OD	Mean(OD)	Note
1	F0Cf	0.58
1	F0Cf	0.641	0.6105
2	F0Cf	0.58
2	F0Cf	0.54	0.56
3	F0Cf	1.21
3	F0Cf	0.91	1.06
4	F0Cf	1.51
4	F0Cf	1.15	1.33
1	F0Cm	1.1
1	F0Cm	1.24	1.17
2	F0Cm	1.18
2	F0Cm	1.1	1.14
3	F0Cm	1.11
3	F0Cm	1.31	1.21
4	F0Cm	1.51
4	F0Cm	1.47	1.49
1	F0Ef	1.41
1	F0Ef	1.61	1.51
2	F0Ef	1.21
2	F0Ef	1.35	1.28
3	F0Ef	1.61
3	F0Ef	1.52	1.565
4	F0Ef	1.48
4	F0Ef	1.49	1.485
1	F0Em	0.75
1	F0Em	0.81	0.78
2	F0Em	0.55
2	F0Em	0.79	0.67
3	F0Em	0.98
3	F0Em	0.96	0.97
4	F0Em	1.1
4	F0Em	1.64	1.37
1	F0Sf	0.54
1	F0Sf	0.56	0.55
2	F0Sf	0.4
2	F0Sf	0.58	0.49
3	F0Sf	0.83
3	F0Sf	1.19	1.01
4	F0Sf	1.02
4	F0Sf	1.3	1.16
1	F0Sm	0.8
1	F0Sm	1	0.9
2	F0Sm	0.44
2	F0Sm	0.58	0.51
3	F0Sm	1.29
3	F0Sm	1.69	1.49
4	F0Sm	1.36
4	F0Sm	2.1	1.73
1	F1Cf	0.54
1	F1Cf	0.64	0.59
2	F1Cf	1.36
2	F1Cf	1.32	1.34
3	F1Cf	1.599
3	F1Cf	1.951	1.775
4	F1Cf	1.21
4	F1Cf	1.92	1.565
1	F1Cm	1.16
1	F1Cm	1.18	1.17
2	F1Cm	0.04
2	F1Cm	0.1	0.07
3	F1Cm	0.01
3	F1Cm	0.03	0.02
4	F1Cm	0.04
4	F1Cm	0.08	0.06
1	F1Ef	1.14
1	F1Ef	1.2	1.17
2	F1Sf	0.12
2	F1Sf	0.08	0.1
3	F1Ef	1.41
3	F1Ef	1.88	1.645
4	F1Ef	1.21
4	F1Ef	1.74	1.475
1	F1Em	1.03
1	F1Em	0.75	0.89
2	F1Em	1.81
2	F1Em	1.49	1.65
3	F1Em	1.13
3	F1Em	1.31	1.22
4	F1Em	1.3
4	F1Em	1.82	1.56
1	F1Sf	-0.07
1	F1Sf	-0.11	-0.09	no negative OD --> OD = 0
2	F1Ef	1.21
2	F1Ef	1.61	1.41
3	F1Sf	1.61
3	F1Sf	1.94	1.775
4	F1Sf	1.51
4	F1Sf	1.29	1.4
1	F1Sm	1.9
1	F1Sm	2.32	2.11
2	F1Sm	1.9
2	F1Sm	0.92	1.41
3	F1Sm	1.8
3	F1Sm	0.98	1.39
4	F1Sm	1.5
4	F1Sm	1.04	1.27

## Sheet: Table 8B
Biological sample	Sample	Mean(OD_F0,OD_F1)
1	Cf	0.60025
1	Cm	1.17
2	Cf	0.95
2	Cm	0.605
3	Cf	1.4175
3	Cm	0.615
4	Cf	1.4475
4	Cm	0.775

## Sheet: Table 8C
Biological sample	Sample	Histone acetylation (% of control) (OD(treatment)/OD(control)*100%)	Fold histone acetylation relative to control
1	F0Cf	100	1
2	F0Cf	100	1
3	F0Cf	100	1
4	F0Cf	100	1
1	F0Cm	100	1
2	F0Cm	100	1
3	F0Cm	100	1
4	F0Cm	100	1
1	F0Ef	251.562	2.51562
2	F0Ef	134.737	1.34737
3	F0Ef	110.406	1.10406
4	F0Ef	102.591	1.02591
1	F0Em	66.6667	0.666667
2	F0Em	110.744	1.10744
3	F0Em	157.724	1.57724
4	F0Em	176.774	1.76774
1	F0Sf	91.6285	0.916285
2	F0Sf	51.5789	0.515789
3	F0Sf	71.2522	0.712522
4	F0Sf	80.1382	0.801382
1	F0Sm	76.9231	0.769231
2	F0Sm	84.2975	0.842975
3	F0Sm	242.276	2.42276
4	F0Sm	223.226	2.23226
1	F1Cf	100	1
2	F1Cf	100	1
3	F1Cf	100	1
4	F1Cf	100	1
1	F1Cm	100	1
2	F1Cm	100	1
3	F1Cm	100	1
4	F1Cm	100	1
1	F1Ef	194.919	1.94919
2	F1Ef	148.421	1.48421
3	F1Ef	116.049	1.16049
4	F1Ef	101.9	1.019
1	F1Em	76.0684	0.760684
2	F1Em	272.727	2.72727
3	F1Em	198.374	1.98374
4	F1Em	201.29	2.0129
1	F1Sf	0	0
2	F1Sf	10.5263	0.105263
3	F1Sf	125.22	1.2522
4	F1Sf	96.7185	0.967185
1	F1Sm	180.342	1.80342
2	F1Sm	233.058	2.33058
3	F1Sm	226.016	2.26016
4	F1Sm	163.871	1.63871

## Sheet: Table 8D
Sample	Mean(histone acetylation (% of control))	Median(histone acetylation (% of control))	Sd(histone acetylation (% of control))	Se(histone acetylation (% of control))	Mean(fold histone acetylation)	Median(fold histone acetylation)	Sd(fold histone acetylation)	Se(fold histone acetylation)
Cf	100	100	0	0	1	1	0	0
Cm	100	100	0	0	1	1	0	0
F0Ef	149.824	122.571	69.193	34.5965	1.49824	1.22571	0.69193	0.345965
F0Em	127.977	134.234	49.403	24.7015	1.27977	1.34234	0.49403	0.247015
F0Sf	73.6495	75.6952	16.9135	8.45677	0.736495	0.756952	0.169135	0.0845677
F0Sm	156.681	153.762	88.2336	44.1168	1.56681	1.53762	0.882336	0.441168
F1Ef	140.322	132.235	41.2788	20.6394	1.40322	1.32235	0.412788	0.206394
F1Em	187.115	199.832	81.6262	40.8131	1.87115	1.99832	0.816262	0.408131
F1Sf	58.1163	53.6224	62.2774	31.1387	0.581163	0.536224	0.622774	0.311387
F1Sm	200.822	203.179	33.9545	16.9772	2.00822	2.03179	0.339545	0.169772
